# Supplementary material
Source: Research Square preprint supplement (doi:10.21203/rs.3.rs-9602420/v1)
Supplement: Supplementary file 1 [file 215b3284864fae3d94a9b555.xlsx]

## Sheet: Checklist_Items
Fidelity component	Item code	Indicator (observable)	Operational definition	Primary data source	Scale	Assessment frequency
Adherence	ADH1	Use of correct theme-specific flyer	Extent to which CHWs delivered each session according to prescribed SOP steps and SCT-informed implementation strategies	Supervisor observation; CHW session records	Likert scale (1 = strongly disagree to 5 = strongly agree)	Quartely for each CHW(at least one observed session per CHW)
Adherence	ADH2	Delivery followed SOP sequence (introduction, message delivery, modelling, guided practice, reinforcement, agreement on actions, recording)	Extent to which CHWs delivered each session according to prescribed SOP steps and SCT-informed implementation strategies	Supervisor observation; CHW session records	Likert scale (1 = strongly disagree to 5 = strongly agree)	Quartely for each CHW (at least one observed session per CHW)
Adherence	ADH3	Application of required strategies (modelling, guided practice, reinforcement, mobilisation of social support)	Extent to which CHWs delivered each session according to prescribed SOP steps and SCT-informed implementation strategies	Supervisor observation; CHW session records	Likert scale (1 = strongly disagree to 5 = strongly agree)	Quartely for each CHW (at least one observed session per CHW)
Adherence	ADH4	Coverage of key messages	Extent to which CHWs delivered each session according to prescribed SOP steps and SCT-informed implementation strategies	Supervisor observation; CHW session records	Likert scale (1 = strongly disagree to 5 = strongly agree)	Quartely for each CHW (at least one observed session per CHW)
Dose delivered	DD1	Completion of scheduled Quartely household visit	Amount of intervention content delivered as planned across the implementation period	CHW attendance sheets; supervision records	Likert scale (1–5)	Quartely for each CHW
Dose delivered	DD2	Delivery of theme according to nine-month schedule	Amount of intervention content delivered as planned across the implementation period	CHW attendance sheets; supervision records	Likert scale (1–5)	Quartely for each CHW
Dose delivered	DD3	Demonstrations conducted (e.g. balanced meal portions, handwashing, reading food labels etc.)	Amount of intervention content delivered as planned across the implementation period	CHW attendance sheets; supervision records	Likert scale (1–5)	Quartely for each CHW
Dose delivered	DD4	Follow-up on previous session actions	Amount of intervention content delivered as planned across the implementation period	CHW attendance sheets; supervision records	Likert scale (1–5)	Quartely for each CHW
Dose received	DR1	Adolescent present during visit	Extent of adolescent and household exposure to delivered intervention content	CHW checklist; supervision notes	Likert scale (1–5)	Quartely for each CHW
Dose received	DR2	Parent or guardian participation	Extent of adolescent and household exposure to delivered intervention content	CHW checklist; supervision notes	Likert scale (1–5)	Quartely for each CHW
Dose received	DR3	Engagement in guided practice activities (e.g. naming foods, meal planning, physical activity planning)	Extent of adolescent and household exposure to delivered intervention content	CHW checklist; supervision notes	Likert scale (1–5)	Quartely for each CHW
Dose received	DR4	Reported completion of agreed household actions	Extent of adolescent and household exposure to delivered intervention content	CHW checklist; supervision notes	Likert scale (1–5)	Quartely for each CHW
Quality of delivery	QOD1	Clear explanation using local examples	Degree to which CHWs delivered content clearly, interactively, and contextually	Supervisor observation	Likert scale (1–5)	Quartely for each CHW
Quality of delivery	QOD2	Correct use of visual-aided materials	Degree to which CHWs delivered content clearly, interactively, and contextually	Supervisor observation	Likert scale (1–5)	Quartely for each CHW
Quality of delivery	QOD3	Respectful and inclusive communication	Degree to which CHWs delivered content clearly, interactively, and contextually	Supervisor observation	Likert scale (1–5)	Quartely for each CHW
Quality of delivery	QOD4	Effective myth correction	Degree to which CHWs delivered content clearly, interactively, and contextually	Supervisor observation	Likert scale (1–5)	Quartely for each CHW
Quality of delivery	QOD5	Provision of encouragement and positive feedback	Degree to which CHWs delivered content clearly, interactively, and contextually	Supervisor observation	Likert scale (1–5)	Quartely for each CHW
Participant responsiveness	PR1	Adolescents asked questions or shared experiences	Level of adolescent and household engagement with intervention messages	CHW checklist; supervision notes	Likert scale (1–5)	Quartely for each CHW
Participant responsiveness	PR2	Household discussion of messages observed	Level of adolescent and household engagement with intervention messages	CHW checklist; supervision notes	Likert scale (1–5)	Quartely for each CHW
Participant responsiveness	PR3	Adolescents reported trying recommended practices	Level of adolescent and household engagement with intervention messages	CHW checklist; supervision notes	Likert scale (1–5)	Quartely for each CHW
Participant responsiveness	PR4	Parents expressed support or commitment to changes	Level of adolescent and household engagement with intervention messages	CHW checklist; supervision notes	Likert scale (1–5)	Quartely for each CHW
Program differentiation	PD1	Use of ARISE-NUTRINT-specific information flyers and SOPs	Extent to which the intervention was distinguishable from routine CHW health education	Supervisor observation; CHW reports	Likert scale (1–5)	Mid-implementation and endline
Program differentiation	PD2	Focus on adolescent-specific nutrition themes	Extent to which the intervention was distinguishable from routine CHW health education	Supervisor observation; CHW reports	Likert scale (1–5)	Mid-implementation and endline
Program differentiation	PD3	Interactive SCT-based implementation strategies used	Extent to which the intervention was distinguishable from routine CHW health education	Supervisor observation; CHW reports	Likert scale (1–5)	Mid-implementation and endline
Program differentiation	PD4	Households recognised sessions as different from routine health talks	Extent to which the intervention was distinguishable from routine CHW health education	Supervisor observation; CHW reports	Likert scale (1–5)	Mid-implementation and endline
