# Supplementary material
Source: Research Square preprint supplement (doi:10.21203/rs.3.rs-9602420/v1)
Supplement: Supplementary file 3 [file d170cdbb7cb86b95276971ec.xlsx]

## Sheet: Fidelity_Data
Record_ID	Phase	CHW_ID	Household_ID	Theme	ADH1	ADH2	ADH3	ADH4	DD1	DD2	DD3	DD4	DR1	DR2	DR3	DR4	QOD1	QOD2	QOD3	QOD4	QOD5	PR1	PR2	PR3	PR4	PD1	PD2	PD3	PD4
Unique row ID	Early/Mid/Late implementation phase (M=Months)	CHW identifier	Household/participant ID	Theme delivered (e.g., month theme)	Adherence: Use of correct theme-specific flyer	Adherence: delivery followed SOP sequence (introduction, message delivery, modelling, guided practice, reinforcement, agreement on actions, recording)	Adherence: application of required strategies (modelling, guided practice, reinforcement, mobilisation of social support)	Adherence: coverage of key messages	Dose delivered: Completion of scheduled monthly household visit	Dose delivered: delivery of theme according to nine-month schedule	Dose delivered: demonstrations conducted (e.g. balanced meal portions, handwashing, label reading)	Dose delivered: follow-up on previous session actions	Dose received: Adolescent present during visit	Dose received: parent or guardian participation	Dose received: engagement in guided practice activities (e.g. naming foods, meal planning, physical activity planning)	Dose received: reported completion of agreed household actions	Quality of delivery: Clear explanation using local examples	Quality of delivery: correct use of visual-aided materials	Quality of delivery: respectful and inclusive communication	Quality of delivery: effective myth correction	Quality of delivery: provision of encouragement and positive feedback	Participant responsiveness: Adolescents asked questions or shared experiences	Participant responsiveness: household discussion of messages observed	Participant responsiveness: adolescents reported trying recommended practices	Participant responsiveness: parents expressed support or commitment to changes	Program differentiation: Use of ARISE-NUTRINT-specific visual materials	Program differentiation: focus on adolescent-specific nutrition themes	Program differentiation: interactive SCT-based delivery strategies used	Program differentiation: households recognised sessions as different from routine health talks
1	Early (M1–3)	CHW01	HH041	Theme 1	5	4	4	5	4	4	5	4	4	4	4	4	5	5	4	4	4	4	5	4	4
2	Early (M1–3)	CHW02	HH010	Theme 1	4	5	4	4	4	4	4	4	4	3	4	4	5	5	4	5	4	4	4	4	4
3	Early (M1–3)	CHW03	HH006	Theme 1	4	4	4	5	4	4	4	4	5	4	4	4	4	4	4	5	4	4	4	3	4
4	Early (M1–3)	CHW04	HH003	Theme 1	4	4	5	5	5	4	4	4	4	4	4	4	5	4	4	4	4	4	4	5	4
5	Early (M1–3)	CHW05	HH006	Theme 2	4	4	4	4	4	4	3	5	3	4	4	4	4	4	4	4	4	4	4	4	5
6	Early (M1–3)	CHW06	HH017	Theme 2	4	4	4	5	5	4	4	4	4	5	5	5	4	4	4	5	5	5	4	4	4
7	Early (M1–3)	CHW07	HH037	Theme 2	5	5	5	5	4	4	4	4	4	5	4	4	4	4	4	5	5	4	4	4	4
8	Early (M1–3)	CHW08	HH022	Theme 3	4	4	4	4	4	4	4	5	4	4	4	4	4	5	5	4	4	4	3	4	4
9	Early (M1–3)	CHW09	HH028	Theme 3	4	4	4	4	4	4	4	4	4	4	4	4	4	5	4	5	4	4	4	4	5
10	Early (M1–3)	CHW10	HH006	Theme 3	4	4	4	4	4	4	4	3	5	4	5	4	5	5	4	4	4	4	4	5	4
11	Mid (M4–6)	CHW01	HH035	Theme 4	4	4	4	4	4	4	4	4	4	5	4	4	5	5	4	5	4	4	4	4	4	5	5	4	4
12	Mid (M4–6)	CHW02	HH020	Theme 4	5	4	5	5	4	5	4	4	4	4	5	5	4	4	5	5	4	3	3	4	4	5	4	4	4
13	Mid (M4–6)	CHW03	HH009	Theme 4	4	4	4	4	4	4	4	5	4	5	5	4	5	5	4	4	4	4	4	5	4	4	5	5	5
14	Mid (M4–6)	CHW04	HH035	Theme 4	4	5	4	4	4	4	5	4	3	4	4	4	5	5	4	4	5	5	5	5	3	5	4	5	5
15	Mid (M4–6)	CHW05	HH022	Theme 5	5	4	5	4	4	5	5	5	4	4	4	4	4	5	4	4	5	4	5	3	4	5	4	5	4
16	Mid (M4–6)	CHW06	HH008	Theme 5	4	5	5	4	4	4	4	4	5	4	4	4	4	4	4	5	4	4	4	4	4	5	5	4	5
17	Mid (M4–6)	CHW07	HH055	Theme 5	4	4	4	5	4	4	4	4	5	4	4	4	4	5	5	4	4	4	4	4	4	5	4	5	5
18	Mid (M4–6)	CHW08	HH006	Theme 6	4	4	4	4	5	4	4	4	4	4	4	3	5	5	5	4	4	4	4	4	5	5	5	5	4
19	Mid (M4–6)	CHW09	HH028	Theme 6	5	5	4	4	4	5	4	4	4	3	3	4	5	4	4	4	5	4	5	4	4	5	5	5	5
20	Mid (M4–6)	CHW10	HH041	Theme 6	4	4	4	4	4	4	5	4	4	4	4	4	5	4	4	4	5	4	4	4	3	5	4	5	5
21	Late (M7–9)	CHW01	HH049	Theme 7	5	4	4	5	4	4	4	4	4	4	4	5	4	5	4	4	4	4	4	4	5	5	5	5	5
22	Late (M7–9)	CHW02	HH014	Theme 7	4	4	5	4	5	4	4	4	4	3	4	4	5	4	4	4	4	4	4	4	4	4	4	5	5
23	Late (M7–9)	CHW03	HH050	Theme 7	5	5	4	4	5	3	4	4	4	5	4	4	4	4	4	4	5	4	4	4	5	5	5	4	4
24	Late (M7–9)	CHW04	HH033	Theme 7	4	4	5	4	4	5	4	4	4	4	4	4	4	5	4	4	4	4	4	4	4	5	5	5	5
25	Late (M7–9)	CHW05	HH040	Theme 7	4	4	4	4	4	5	4	5	4	4	5	4	5	5	4	4	4	4	3	4	4	5	4	4	4
26	Late (M7–9)	CHW06	HH034	Theme 8	4	4	5	4	5	4	4	4	4	4	4	4	4	4	5	4	3	4	4	4	4	5	5	5	5
27	Late (M7–9)	CHW07	HH018	Theme 8	5	4	4	4	4	4	5	4	4	4	4	4	5	4	5	4	5	4	4	4	4	4	5	5	5
28	Late (M7–9)	CHW08	HH051	Theme 8	4	4	5	4	4	5	3	4	5	4	4	4	4	5	5	5	5	4	4	4	4	5	5	4	4
29	Late (M7–9)	CHW09	HH030	Theme 9	4	4	4	4	4	4	4	4	4	3	4	4	5	5	4	4	4	4	4	4	4	4	4	5	5
30	Late (M7–9)	CHW10	HH021	Theme 9	4	4	4	5	4	3	4	5	4	4	4	4	4	4	4	5	5	4	4	4	4	4	5	5	4
